# Supplementary material for: Efficient Nonviral Transfection of Human Bone Marrow Mesenchymal Stromal Cells Shown Using Placental Growth Factor Overexpression
Source: Stem Cells Int. 2018 Dec 24;2018:1310904. doi: 10.1155/2018/1310904 (PMC6323439; doi:10.1155/2018/1310904)
Supplement: Supplementary 1 — Supplementary Table 1: in-process data for working cell banks of hBM-MSCs. Supplementary Table 2: information on antibodies for hMSC surface marker staining. Supplementary Table 3: differentiation of transfected and untransfected hBM-MSCs into osteocytes, adipocytes, and chondrocytes. [file 1310904.f1.pdf]

**Supplementary Table 1.** In-process data for working cell banks of hBM-MSCs.

| <sup>a</sup> Donor<br>ID/gender/age | <sup>b</sup> P1-P2 growth<br>MSCs plated per cm <sup>2</sup> /<br>cells harvested per cm <sup>2</sup> /<br>days | <sup>c</sup> P1-P2<br>Population<br>doublings | <sup>b</sup> P2-P3 growth<br>MSCs plated per cm <sup>2</sup> /<br>cells harvested per cm <sup>2</sup> /<br>days | <sup>c</sup> P2-P3<br>Population<br>doublings | <sup>d</sup> Differentiation<br>osteocytes /<br>adipocytes /<br>chondrocytes | <sup>e</sup> Surface Marker<br>Expression    |
|-------------------------------------|-----------------------------------------------------------------------------------------------------------------|-----------------------------------------------|-----------------------------------------------------------------------------------------------------------------|-----------------------------------------------|------------------------------------------------------------------------------|----------------------------------------------|
| hBM-<br>MSC#15/M/22                 | 1571/9523/3                                                                                                     | 2.60                                          | 4286/23347/3                                                                                                    | 2.45                                          | P3 testing + / + / +                                                         | >95% CD105, CD73 and<br>CD90, <2% CD45, CD34 |
| hBM-<br>MSC#12RB/M/33               | 2720/22800/4                                                                                                    | 3.07                                          | 1429/44229/6                                                                                                    | 4.95                                          | P1 testing + / + / +                                                         | >95% CD105, CD73 and<br>CD90, <5% CD45, CD34 |
| hBM-<br>MSC#37RB/M/43               | 2857/28571/4                                                                                                    | 3.32                                          | 1429/18286/4                                                                                                    | 3.68                                          | P1 testing + / + / +                                                         | >95% CD105, CD73 and<br>CD90, <2% CD45, CD34 |
| hBM-<br>MSC#48RB/M/23               | 1429/15238/4                                                                                                    | 3.42                                          | 1429/21371/4                                                                                                    | 3.90                                          | P1 testing + / + / +                                                         | >95% CD105, CD73 and<br>CD90, <5% CD45, CD34 |
| hBM-<br>MSC#56RB/M/22               | 1429/20571/4                                                                                                    | 3.85                                          | 1429/15771/4                                                                                                    | 3.46                                          | P1 testing + / + / +                                                         | >95% CD105, CD73 and<br>CD90, <2% CD45, CD34 |
| hBM-<br>MSC#85RB/M/31-45            | 1429/24000/4                                                                                                    | 3.00                                          | 1429/27200/4                                                                                                    | 4.32                                          | P1 testing + / + / +                                                         | >90% CD105, CD73 and<br>CD90, <2% CD45, CD34 |

<sup>a</sup>Healthy donors were identified by anonymous identifier/gender/age. h=human, BM=bone marrow, #15 cells were grown in Mesencult SF medium and RB cells were grown in RB complete medium.

<sup>b</sup>P1-P2 or P2-P3 growth was defined as number of MSC cells plated per cm<sup>2</sup> / number of cells harvested per cm<sup>2</sup> at / days of incubation. Cells were harvested at 70-90% confluence.

<sup>c</sup>Cell population doublings were calculated as  $n = \log_2 (\text{harvested viable cells} / \text{initial seeded viable cells})$

<sup>d</sup>Differentiation was assayed by chemical staining after culture in inductive media (+ = present).

<sup>e</sup>Cell surface profiling by flow cytometry

**Supplementary Table 2.** Information on antibodies for hMSC surface marker staining.

| Reagent                            | Company        | Clone number                          | Catalog number | Application                                                               |
|------------------------------------|----------------|---------------------------------------|----------------|---------------------------------------------------------------------------|
| CD34-PE                            | eBioscience    | 4H11                                  | 12-0349-42     | Initial chacterization of hBM-MSC #15 surface markers <sup>a</sup>        |
| CD45-FITC                          | eBioscience    | HI30                                  | 11-0459-42     |                                                                           |
| CD73-PE-Cy7                        | eBioscience    | AD2                                   | 25-0739-42     |                                                                           |
| CD90-PerCP-Cy5.5                   | eBioscience    | 5E10                                  | 45-0909-41     |                                                                           |
| CD105-APC                          | eBioscience    | SN6                                   | 17-1057-41     |                                                                           |
| CD73-BUV737                        | BD Biosciences | AD2                                   | 565395         | Chacterization of hBM-MSC surface markers after transfection <sup>b</sup> |
| CD90-APC                           | BD Biosciences | 5E10                                  | 559869         |                                                                           |
| CD105-BUV395                       | BD Biosciences | 266                                   | 563803         |                                                                           |
| BD Stemflow Human MSC Analysis Kit | BD Biosciences | See manufacture's specification sheet | 562245         | Chacterization of hBM-MSC #37RB surface markers <sup>c</sup>              |

<sup>a</sup>Cells and antibodies were incubated for 30 minutes, washed, then live cells were analysed with PBS 2% FCS.

<sup>b</sup>Antibody mixes were prepared in BD Horizon™ Brilliant Stain Buffer (BD biosciences, cat.# 659611, BD biosciences). Cells were stained with antibodies for 30 minutes, washed, then live cells were analysed with PBS 2% FCS.

<sup>c</sup>Followed procedure according to manufacture's protocol. Kit contains antibodies for CD73, CD90, CD105, CD44, CD34, CD45, CD11b, CD19, and HLA-DR

**Supplementary Table 3.** Differentiation of transfected and untransfected hBM-MSCs into osteocytes, adipocytes and chondrocytes.

| <b>Donor ID</b> | <sup>a</sup> Differentiation of untransfected cells<br>osteocytes / adipocytes / chondrocytes | <sup>a</sup> Differentiation after GFP transfection<br>osteocytes / adipocytes / chondrocytes |
|-----------------|-----------------------------------------------------------------------------------------------|-----------------------------------------------------------------------------------------------|
| hBM-MSC#12RB    | + / + / +                                                                                     | + / + / +                                                                                     |
| hBM-MSC#37RB    | + / + / +                                                                                     | + / + / +                                                                                     |
| hBM-MSC#48RB    | <sup>b</sup> ND                                                                               | <sup>b</sup> ND                                                                               |
| hBM-MSC#56RB    | + / + / +                                                                                     | + / + / +                                                                                     |
| hBM-MSC#85RB    | + / + / +                                                                                     | + / + / +                                                                                     |

<sup>a</sup>Differentiation was assayed by chemical staining after culture in inductive media (+ = present)<sup>b</sup>Not determined
